# Supplementary material for: Examining the Use of Glucose and Physical Activity Self-Monitoring Technologies in Individuals at Moderate to High Risk of Developing Type 2 Diabetes: Randomized Trial
Source: PubMed Central journal article supplement (PMC6913728; doi:10.2196/14195), 2019-10-28
Supplement: mhealth_v7i10e14195_app2.pdf [file mhealth_v7i10e14195_app2.pdf]

Screenshot showing feedback from the Fitbit and Freestyle Libre apps

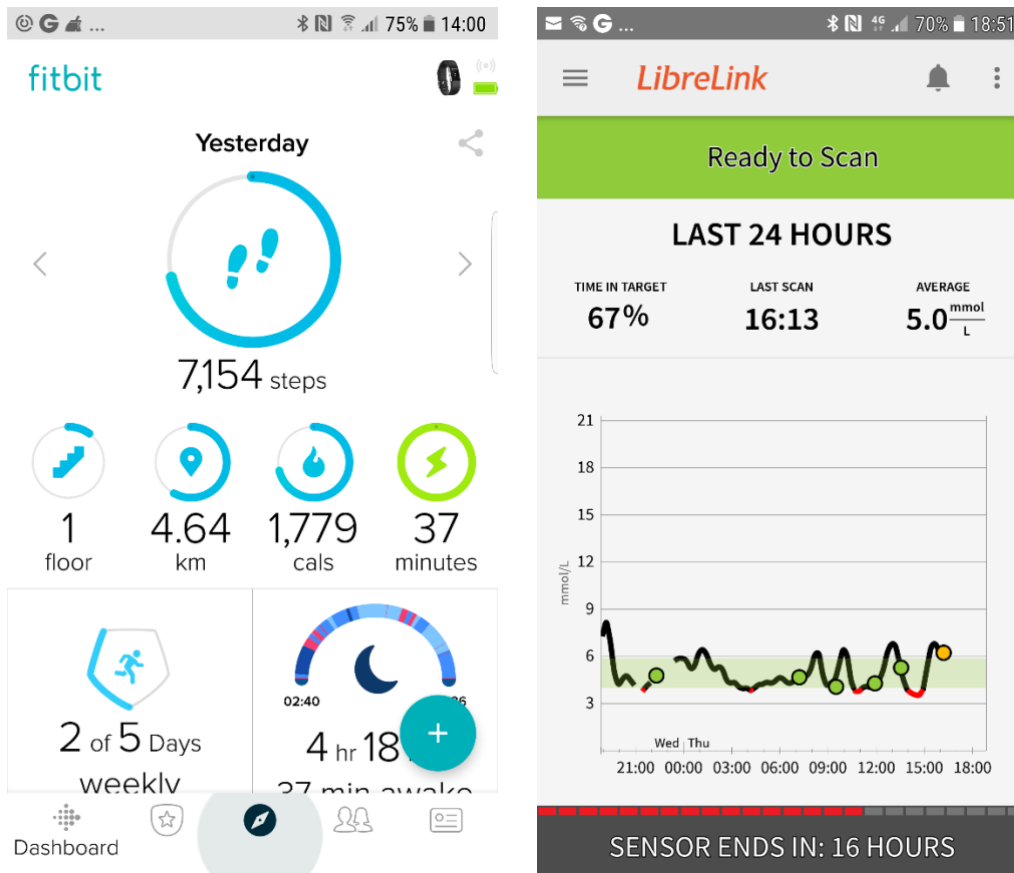

Device deployment

Table. An outline of the data collection procedures for the 3 self-monitoring technologies deployed.

|                       | ActiGraph wGT3x-BT                                                                                      | Fitbit Charge 2                                                           | Abbott Freestyle Libre                                                                                                                                                                                                                      |
|-----------------------|---------------------------------------------------------------------------------------------------------|---------------------------------------------------------------------------|---------------------------------------------------------------------------------------------------------------------------------------------------------------------------------------------------------------------------------------------|
| <b>Devices</b>        | 24 devices used                                                                                         | 45 devices used                                                           | 176 devices used<br>0 handheld readers used                                                                                                                                                                                                 |
| <b>Sample rate</b>    | 100 Hz (.gt3x file format)                                                                              | 60 seconds                                                                | 900 seconds                                                                                                                                                                                                                                 |
| <b>Epoch</b>          | 60 seconds                                                                                              | 60 seconds                                                                | 900 seconds                                                                                                                                                                                                                                 |
| <b>Initialisation</b> | Deployed in delay mode on day 0. Commenced logging on day 1 at 00:00:00; stop time applied 7 days after | Commenced logging data at point of initialisation on day 0                | Commence logging data 1 hour after point of initialisation on day 8 (Groups 1 – G <sub>4</sub> GPA <sub>2</sub> and 3 – GPA <sub>6</sub> ) and day 29 (Group 2 – PA <sub>4</sub> GPA <sub>2</sub> ) and after any additional sensors fitted |
| <b>Deployment</b>     | Fitted by participant (on day 0) with guidance from researcher                                          | Fitted by participant (on day 0) with guidance from researcher            | Fitted on by participant (using step-by-step instructions and guidance from research team) on day 0 of intervention to inform subsequent self-deployment of sensors                                                                         |
| <b>Location</b>       | Anterior hip, mid-line of the right thigh                                                               | Non-dominant wrist                                                        | Upper portion, non-dominant posterior brachium                                                                                                                                                                                              |
| <b>Wear duration</b>  | Baseline: 7 days (10,080 epochs)<br>Intervention: Not worn                                              | Baseline: 7 days (10,080 epochs)<br>Intervention: 42 days (60,480 epochs) | Baseline: Not worn<br>Intervention: 42 days (60,480 epochs)                                                                                                                                                                                 |

|                           |                                                                                               |                                                            |                                                                                                 |
|---------------------------|-----------------------------------------------------------------------------------------------|------------------------------------------------------------|-------------------------------------------------------------------------------------------------|
| <b>Wear instructions</b>  | Continual wear except removal for sleep and water-based activities                            | Continual wear except for sleep and water-based activities | Continual wear (24hr) with adhesive tape over sensor                                            |
| <b>Charging</b>           | Not required                                                                                  | Requested to charge overnight every day                    | Not required                                                                                    |
| <b>Non-wear</b>           | ≥60 min of consecutive zeros with allowance for 2 minutes of interruptions coded as non-wear. | An absence of heart rate signal.                           | Lifespan of sensor not met (expected duration of 14 days) and any missing data between sensors. |
| <b>Valid day criteria</b> | ≥10 hours of valid waking wear time                                                           | ≥10 hours of valid waking wear time                        | ≥90% of data points per day                                                                     |
| <b>Valid file</b>         | Baseline: ≥4 valid days<br>Intervention: Not applicable                                       | Baseline: ≥4 valid days<br>Intervention: ≥24 valid days    | Baseline: Not applicable<br>Intervention: ≥4 days                                               |
