# Supplementary material for: Examining the Use of Glucose and Physical Activity Self-Monitoring Technologies in Individuals at Moderate to High Risk of Developing Type 2 Diabetes: Randomized Trial
Source: PubMed Central journal article supplement (PMC6913728; doi:10.2196/14195), 2019-10-28
Supplement: mhealth_v7i10e14195_app4.pdf [file mhealth_v7i10e14195_app4.pdf]

### Freestyle Libre – data capture (%)/missing data in min

Table. An outline of data capture from the Freestyle Libre stratified by group allocation, reported as mean±SD

|                                             | Week 1   | Week 2    | Week 3    | Week 4    | Week 5    | Week 6    |
|---------------------------------------------|----------|-----------|-----------|-----------|-----------|-----------|
| <b>Total data capture (%)</b>               |          |           |           |           |           |           |
| Group 1: G <sub>4</sub> GPA <sub>2</sub>    | 87.6±2.7 | 87.4±15.7 | 87.2±16.5 | 82.0±21.5 | 85.8±14.7 | 83.1±17.5 |
| Group 2: PA <sub>4</sub> GPA <sub>2</sub>   |          |           |           |           | 80.2±11.7 | 73.2±28.6 |
| Group 3: GPA <sub>6</sub>                   | 86.7±4.8 | 93.7±4.5  | 91.9±6.5  | 91.1±9.1  | 89.0±11.6 | 89.6±10.8 |
| <b>Amount of missing data (minutes/day)</b> |          |           |           |           |           |           |
| Group 1: G <sub>4</sub> GPA <sub>2</sub>    | 27.4±6.5 | 27.1±31.7 | 26.8±33.6 | 37.7±44.0 | 29.8±30.0 | 35.1±35.7 |
| Group 2: PA <sub>4</sub> GPA <sub>2</sub>   |          |           |           |           | 41.6±23.3 | 55.3±58.5 |
| Group 3: GPA <sub>6</sub>                   | 28.0±9.8 | 13.0±9.2  | 17.1±13.0 | 18.8±18.6 | 22.7±23.8 | 21.6±22.1 |
